# Supplementary material
Source: PubMed Central journal article supplement (PMC6425851)
Supplement: cre-0053-0160-S02.pdf [file cre-0053-0160-S02.pdf]

# Development of the diet questionnaire

## Aim

- **To obtain relevant information about dietary habits based on actual behavior.**
- **To have a format that can be used for children in first, fourth, and sixth grade, as well as for parents.**

## Development of diet questionnaire

1. First, the relevant literature was examined. In the process, the following already available instruments were assessed in detail:
  - Augsburg Food Frequency List (Winkeler & Döring, 1998),
  - Questions about diet from the German Oral Health Study (Micheelis & Schiffner, 2006)
  - Check list for the Nutrition Report and questionnaire on food frequency (Stegemann & Davis, 2006),
  - KIGGS-Studie (Mensink et al., 2007).
2. Interviews on the eating habits of various ethnic and cultural groups were conducted.
3. The items were tested in a preliminary examination.

# Principles of construction

**Structured questions were formulated that were related to specific everyday situations and able to ascertain what foods were taken that were harmless or detrimental to dental health.**

These included

- breakfast,
- between-meal snacks,
- watching television,
- eating on the go,
- Two additional questions were devised to find out what sort of bread and beverage were preferred.

**5-stage frequency estimation:** never, seldom, occasionally, often, always.

## Basis for the formation of the sugar index

We inquired for six typical situations of everyday life which foods were consumed. The questions about nutrition included a description of the situation and a selection of various foods typical of the situation.

### Part II: Dietary Habits

In the following, we would like to learn how often you eat certain foods or drink certain beverages. Please answer by indicating how often you eat or drink each of the following items. To do so, put an **X** in the answer category (that is, from "never" to "always") which most nearly holds true for you.

| 1. How often do you eat the following foods between meals?                 |                          |                          |                          |                          |                          |
|----------------------------------------------------------------------------|--------------------------|--------------------------|--------------------------|--------------------------|--------------------------|
|                                                                            | never                    | seldom                   | occasionally             | often                    | always                   |
| Apples                                                                     | <input type="checkbox"/> |
| Bananas                                                                    | <input type="checkbox"/> |
| Carrots                                                                    | <input type="checkbox"/> |
| Chocolate bars                                                             | <input type="checkbox"/> |
| Cake                                                                       | <input type="checkbox"/> |
| Granola bars                                                               | <input type="checkbox"/> |
| Fruit yogurt                                                               | <input type="checkbox"/> |
| OTHER (Please indicate): _____                                             |                          |                          |                          |                          |                          |
| 2. How often do you eat the following kinds of bread?                      |                          |                          |                          |                          |                          |
|                                                                            | never                    | seldom                   | occasionally             | often                    | always                   |
| White bread                                                                | <input type="checkbox"/> |
| Brown bread                                                                | <input type="checkbox"/> |
| Whole-grain bread                                                          | <input type="checkbox"/> |
| Crispbread                                                                 | <input type="checkbox"/> |
| Sweet rolls                                                                | <input type="checkbox"/> |
| Flatbread                                                                  | <input type="checkbox"/> |
| Zwieback                                                                   | <input type="checkbox"/> |
| OTHER (Please indicate): _____                                             |                          |                          |                          |                          |                          |
| 3. How often do you imbibe the following beverages when you are traveling? |                          |                          |                          |                          |                          |
|                                                                            | never                    | seldom                   | occasionally             | often                    | always                   |
| Mineral water                                                              | <input type="checkbox"/> |
| Fruit juice                                                                | <input type="checkbox"/> |
| Vegetable juice                                                            | <input type="checkbox"/> |
| Iced tea                                                                   | <input type="checkbox"/> |
| Juice and mineral water                                                    | <input type="checkbox"/> |
| Milk                                                                       | <input type="checkbox"/> |
| cocoadrink                                                                 | <input type="checkbox"/> |
| Coffee with sugar                                                          | <input type="checkbox"/> |
| Soda / cola                                                                | <input type="checkbox"/> |
| Unsweetened tea                                                            | <input type="checkbox"/> |
| OTHER (Please indicate): _____                                             |                          |                          |                          |                          |                          |

| 4. How often do you eat the following foods at breakfast?                        |                          |                          |                          |                          |                          |
|----------------------------------------------------------------------------------|--------------------------|--------------------------|--------------------------|--------------------------|--------------------------|
|                                                                                  | never                    | seldom                   | occasionally             | often                    | always                   |
| Cornflakes with milk                                                             | <input type="checkbox"/> |
| Muesli with fruit                                                                | <input type="checkbox"/> |
| Rolls and jam                                                                    | <input type="checkbox"/> |
| Bread with sausage                                                               | <input type="checkbox"/> |
| Bread with cheese                                                                | <input type="checkbox"/> |
| Cake                                                                             | <input type="checkbox"/> |
| Fruit yogurt                                                                     | <input type="checkbox"/> |
| Oat flakes with fruit                                                            | <input type="checkbox"/> |
| OTHER (Please indicate): _____                                                   |                          |                          |                          |                          |                          |
| 5. How often do you eat the following foods while watching television?           |                          |                          |                          |                          |                          |
|                                                                                  | never                    | seldom                   | occasionally             | often                    | always                   |
| Sweet popcorn                                                                    | <input type="checkbox"/> |
| Salted popcorn                                                                   | <input type="checkbox"/> |
| Chips                                                                            | <input type="checkbox"/> |
| Sour apple rings                                                                 | <input type="checkbox"/> |
| Chocolate                                                                        | <input type="checkbox"/> |
| Fruit                                                                            | <input type="checkbox"/> |
| Dried apricots / dates                                                           | <input type="checkbox"/> |
| Salted nuts                                                                      | <input type="checkbox"/> |
| Cookies                                                                          | <input type="checkbox"/> |
| Raw vegetables (cucumbers, carrots)                                              | <input type="checkbox"/> |
| OTHER (Please indicate): _____                                                   |                          |                          |                          |                          |                          |
| 6. How often do you eat the following foods when you get hungry while traveling? |                          |                          |                          |                          |                          |
|                                                                                  | never                    | seldom                   | occasionally             | often                    | always                   |
| Chocolate / chocolate bars                                                       | <input type="checkbox"/> |
| Cake                                                                             | <input type="checkbox"/> |
| Bratwurst /curried sausage with bread                                            | <input type="checkbox"/> |
| French fries with ketchup / mayonnaise                                           | <input type="checkbox"/> |
| Hamburgers                                                                       | <input type="checkbox"/> |
| Fruit                                                                            | <input type="checkbox"/> |
| Fruit yogurt                                                                     | <input type="checkbox"/> |
| Dry rolls                                                                        | <input type="checkbox"/> |
| Open sandwiches with lettuce                                                     | <input type="checkbox"/> |
| Kebab                                                                            | <input type="checkbox"/> |
| Cookies                                                                          | <input type="checkbox"/> |
| OTHER (Please indicate): _____                                                   |                          |                          |                          |                          |                          |

The frequency of consumption was indicated on answer scales graduated in fives (never, seldom, occasionally, often, always) which were given point values from 1 to 5.

All checked food and beverages that were tooth friendly were given a score of 0 points – regardless of how often they were reportedly consumed.

The other foodstuffs were given the point scored listed above.

| 5. How often do you eat the following foods while watching television? | 1                                   | 2                                   | 3                                   | 4                                   | 5                                   | Point value*  |
|------------------------------------------------------------------------|-------------------------------------|-------------------------------------|-------------------------------------|-------------------------------------|-------------------------------------|---------------|
|                                                                        | never                               | seldom                              | occasionally                        | often                               | always                              |               |
| Sweet popcorn                                                          | <input type="checkbox"/>            | <input type="checkbox"/>            | <input type="checkbox"/>            | <input checked="" type="checkbox"/> | <input type="checkbox"/>            | 4             |
| Salted popcorn                                                         | <input type="checkbox"/>            | <input type="checkbox"/>            | <input checked="" type="checkbox"/> | <input type="checkbox"/>            | <input type="checkbox"/>            | 0             |
| Chips                                                                  | <input type="checkbox"/>            | <input checked="" type="checkbox"/> | <input type="checkbox"/>            | <input type="checkbox"/>            | <input type="checkbox"/>            | 0             |
| Sour apple rings                                                       | <input checked="" type="checkbox"/> | <input type="checkbox"/>            | <input type="checkbox"/>            | <input type="checkbox"/>            | <input type="checkbox"/>            | 0             |
| Chocolate                                                              | <input type="checkbox"/>            | <input type="checkbox"/>            | <input type="checkbox"/>            | <input type="checkbox"/>            | <input checked="" type="checkbox"/> | 5             |
| Fruit                                                                  | <input type="checkbox"/>            | <input type="checkbox"/>            | <input type="checkbox"/>            | <input checked="" type="checkbox"/> | <input type="checkbox"/>            | 0             |
| Dried apricots / dates                                                 | <input type="checkbox"/>            | <input checked="" type="checkbox"/> | <input type="checkbox"/>            | <input type="checkbox"/>            | <input type="checkbox"/>            | 2             |
| Salted nuts                                                            | <input type="checkbox"/>            | <input type="checkbox"/>            | <input checked="" type="checkbox"/> | <input type="checkbox"/>            | <input type="checkbox"/>            | 0             |
| Cookies                                                                | <input type="checkbox"/>            | <input type="checkbox"/>            | <input type="checkbox"/>            | <input checked="" type="checkbox"/> | <input type="checkbox"/>            | 4             |
| Raw vegetables (cucumbers, carrots)                                    | <input type="checkbox"/>            | <input type="checkbox"/>            | <input type="checkbox"/>            | <input type="checkbox"/>            | <input checked="" type="checkbox"/> | 0             |
| OTHER (Please indicate): _____                                         |                                     |                                     |                                     |                                     |                                     | $\Sigma = 15$ |
